# Supplementary material for: Trends and Disparities in the Prevalence of Childhood Obesity in South Texas between 2009 and 2015
Source: Hindawi journal article supplement (doi:10.1155/2017/1424968), 2017-01-01
Supplement: f1 [file 1424968.f1.pdf]

**Supplemental Table 1:** Sample sizes for children and adolescents (age 2-17 years) included in the analysis, all children with biologically plausible BMI z-scores included, by race and ethnicity, stratified by age group

| <b>Age group</b> | <b>All</b> | <b>Hispanic</b> | <b>black</b> | <b>white</b> | <b>Asian</b> |
|------------------|------------|-----------------|--------------|--------------|--------------|
| <b>All ages</b>  | 114,406    | 90,315          | 7,346        | 14,239       | 2,506        |
| 2-5              | 37,349     | 29,616          | 2,375        | 4,468        | 890          |
| 6-11             | 37,045     | 29,236          | 2,283        | 4,674        | 852          |
| 12-17            | 40,012     | 31,463          | 2,688        | 5,097        | 764          |
| <b>Males</b>     | 57,578     | 45,307          | 3,788        | 7,252        | 1,231        |
| 2-5              | 19,104     | 15,129          | 1,240        | 2,357        | 15,129       |
| 6-11             | 18,976     | 14,972          | 1,227        | 2,439        | 14,972       |
| 12-17            | 19,343     | 15,206          | 1,321        | 2,456        | 15,206       |
| <b>Females</b>   | 56,828     | 45,008          | 3,558        | 6,987        | 1,275        |
| 2-5              | 18,155     | 14,487          | 1,135        | 2,111        | 422          |
| 6-11             | 18,004     | 14,264          | 1,056        | 2,235        | 449          |
| 12-17            | 20,669     | 16,257          | 1,367        | 2,641        | 404          |
